# Supplementary material
Source: PubMed Central journal article supplement (PMC7236679)
Supplement: mmc1.pdf [file mmc1.pdf]

COMPARATIVE SCORES OF THE DIFFERENT MEMBERS OF THE UNIVERSITY COMMUNITY

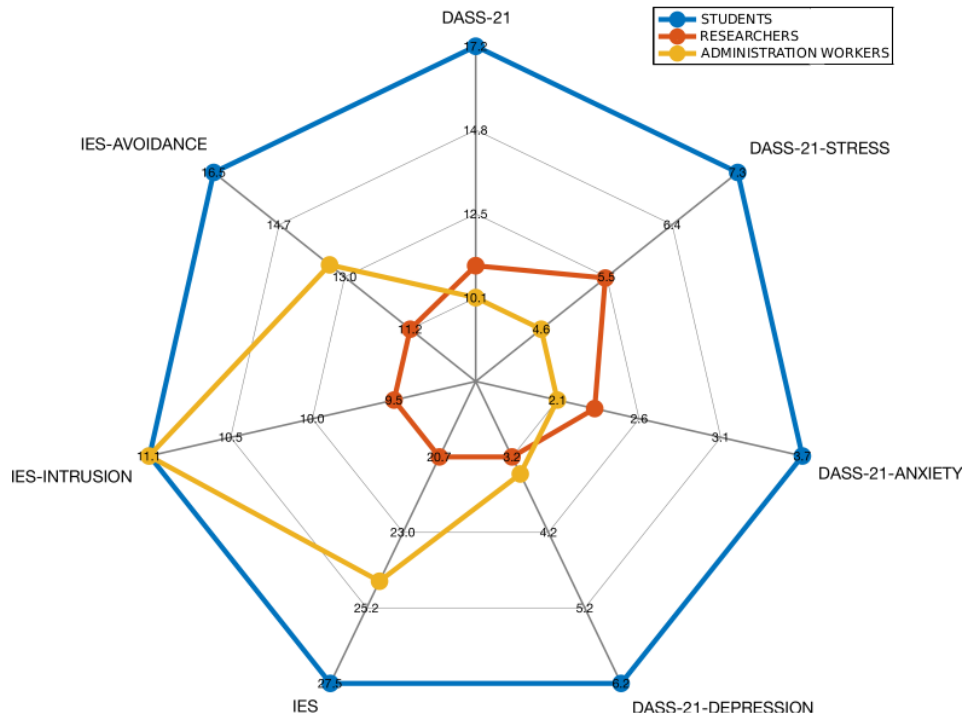

**Supplementary Figure 1.** Radar plot with the distribution of IES and DASS-21 mean scores in the different members of the university community.

COMPARATIVE SCORES OF STUDENTS ACCORDING TO THEIR YEAR AND TYPE OF STUDIES

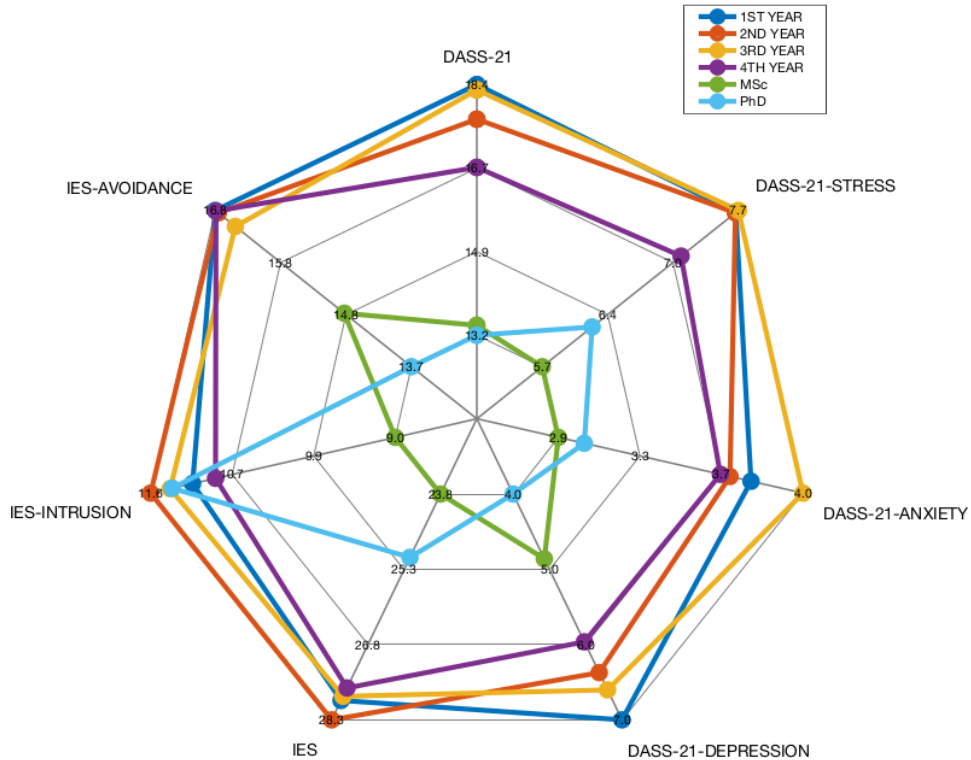

**Supplementary Figure 2.** Radar plot with the distribution of IES and DASS-21 mean scores in different undergraduate years, master (MSc) and PhD students.

**Supplementary Table 1.** Univariate GLM coefficients associating DASS-21 scores with respondents characteristics from the University of Valladolid.

| Characteristics                                              | DASS-21<br>Total | DASS-21<br>Stress | DASS-21<br>Anxiety | DASS-21<br>Depression |
|--------------------------------------------------------------|------------------|-------------------|--------------------|-----------------------|
| Age                                                          | -0.25****        | -0.09****         | -0.05****          | -0.11****             |
| Sex (Female vs. Male)                                        | 6.46****         | 2.56****          | 1.99****           | 1.91****              |
| Marital status                                               |                  |                   |                    |                       |
| Married vs. Single                                           | -5.22****        | -1.79***          | -1.12****          | -2.31****             |
| Divorced vs. Single                                          | -4.45*           | -2.18**           | -0.44              | -1.84*                |
| Widowed vs. Single                                           | -9.86*           | -4.35**           | -2.59*             | -2.93                 |
| Health worker (Yes vs. No)                                   | -0.41            | 0.35              | 0.18               | -0.94*                |
| Live with                                                    |                  |                   |                    |                       |
| Alone vs. 2-4 people                                         | -2.07*           | -1.43***          | -0.19              | -0.45                 |
| 1 vs. 2-4 people                                             | -2.54****        | -1.05****         | -0.23              | -1.31****             |
| 5+ vs. 2-4 people                                            | -0.76            | -0.05             | -0.18              | -0.48                 |
| Changes in employment activity                               |                  |                   |                    |                       |
| No employment activity vs. No                                | 5.96****         | 2.04****          | 1.28****           | 2.63****              |
| Yes vs. No                                                   | 6.10****         | 2.31****          | 1.45****           | 2.34****              |
| COVID-19 test (Yes vs. No)                                   | -0.89            | -0.81             | 0.81               | -0.89                 |
| COVID-19 symptoms (Yes vs. No)                               | 5.63****         | 1.72****          | 2.32****           | 1.59****              |
| Know COVID-19 patient                                        |                  |                   |                    |                       |
| Asymptomatic vs. No                                          | -2.93            | -1.14             | -1.18              | -0.63                 |
| Mild vs. No                                                  | 1.21             | 0.73**            | 0.27               | 0.20                  |
| Moderate vs. No                                              | 1.83**           | 0.94***           | 0.47*              | 0.41                  |
| Severe vs. No                                                | 2.61**           | 1.21***           | 0.81**             | 0.60                  |
| Dead vs. No                                                  | 2.83**           | 1.31***           | 0.89**             | 0.64                  |
| Previous treatment (Yes vs. No)                              | 5.34****         | 1.94****          | 1.68****           | 1.71****              |
| Current treatment (Yes vs. No)                               | 7.77****         | 2.83****          | 2.27****           | 2.67****              |
| Psychoactive medication (Yes vs. No)                         | 8.02****         | 2.65****          | 2.74****           | 2.63****              |
| Positive effect of confinement on relationships (Yes vs. No) | -4.70****        | -1.47****         | -0.91****          | -2.32****             |
| Negative effect of confinement on relationships (Yes vs. No) | 9.81****         | 3.78****          | 2.16****           | 3.88****              |
| Positive effect on social relationships                      |                  |                   |                    |                       |
| Little vs. None                                              | -2.88****        | -0.83****         | -0.60***           | -1.46****             |
| Some vs. None                                                | -4.45****        | -1.21***          | -0.77**            | -2.47****             |
| Great vs. None                                               | -2.16            | -0.91             | 0.37               | -1.62*                |
| Negative effect on social relationships                      |                  |                   |                    |                       |
| Little vs. None                                              | 4.65****         | 1.77****          | 0.85****           | 2.02****              |
| Some vs. None                                                | 9.51****         | 3.69****          | 1.86****           | 3.96****              |
| Great vs. None                                               | 14.38****        | 5.30****          | 3.43****           | 5.65****              |

\*\*\*\* p < 0.0001, \*\*\* p < 0.001, \*\* p < 0.01, \* p < 0.05

**Supplementary Table 2.** Multivariate GLM coefficients associating DASS-21 scores with respondent characteristics from the University of Valladolid.

| Characteristics                                              | DASS-21<br>Total                       | DASS-21<br>Stress                     | DASS-21<br>Anxiety                    | DASS-21<br>Depression                  |
|--------------------------------------------------------------|----------------------------------------|---------------------------------------|---------------------------------------|----------------------------------------|
| Independent term                                             | 15.92 <sup>****</sup> <sub>1,2,3</sub> | 4.58 <sup>****</sup> <sub>1,2,3</sub> | 1.42 <sup>**</sup> <sub>3</sub>       | 4.25 <sup>****</sup> <sub>1,2,3</sub>  |
| Age                                                          | -0.10 <sup>**</sup> <sub>3</sub>       | -0.05 <sup>****</sup> <sub>3</sub>    | -0.01 <sub>2,3</sub>                  | -0.04 <sup>**</sup> <sub>1,3</sub>     |
| Sex (Female vs. Male)                                        | 5.00 <sup>****</sup> <sub>1,2,3</sub>  | 1.99 <sup>****</sup> <sub>1,2,3</sub> | 1.65 <sup>****</sup> <sub>1,2,3</sub> | 1.39 <sup>****</sup> <sub>1,2,3</sub>  |
| Marital status                                               | n.i.                                   | n.i. <sub>2</sub>                     | n.i.                                  | n.i.                                   |
| Married vs. Single                                           |                                        | 1 (< 0)                               |                                       |                                        |
| Divorced vs. Single                                          |                                        | 3 (> 0)                               |                                       |                                        |
| Widowed vs. Single                                           |                                        |                                       |                                       |                                        |
| Health worker (Yes vs. No)                                   | n.i.                                   | n.i.                                  | n.i.                                  | -0.87 <sup>**</sup> <sub>1</sub>       |
| Live with                                                    | n.i.                                   |                                       | n.i.                                  | n.i.                                   |
| Alone vs. 2-4 people                                         |                                        | -0.74 <sup>*</sup>                    |                                       | 1,2 (> 0)                              |
| 1 vs. 2-4 people                                             |                                        | -0.35                                 |                                       | 1,2 (< 0)                              |
| 5+ vs. 2-4 people                                            |                                        | 0.17                                  |                                       |                                        |
| Changes in employment activity                               |                                        |                                       | 1,3                                   |                                        |
| No employment activity vs. No                                | 0.63                                   | 0.08                                  | 0.06                                  | 0.47 <sub>1,2</sub>                    |
| Yes vs. No                                                   | 2.04 <sup>***</sup> <sub>1,2,3</sub>   | 0.82 <sup>***</sup> <sub>1,2,3</sub>  | 0.44 <sup>*</sup> <sub>2</sub>        | 0.79 <sup>**</sup> <sub>1,2</sub>      |
| COVID-19 test (Yes vs. No)                                   | n.i.                                   | n.i.                                  | n.i.                                  | n.i. <sub>3</sub>                      |
| COVID-19 symptoms (Yes vs. No)                               | 4.15 <sup>****</sup> <sub>1,2</sub>    | 1.12 <sup>****</sup> <sub>1,2</sub>   | 1.95 <sup>****</sup> <sub>1,2,3</sub> | 1.12 <sup>***</sup> <sub>1,2</sub>     |
| Know COVID-19 patient                                        |                                        |                                       |                                       |                                        |
| Asymptomatic vs. No                                          | -3.67 <sup>*</sup>                     | -1.41 <sup>*</sup>                    | -1.44 <sup>*</sup>                    | -0.89                                  |
| Mild vs. No                                                  | 0.55                                   | 0.42                                  | 0.05                                  | 0.10                                   |
| Moderate vs. No                                              | 0.77                                   | 0.52 <sup>*</sup> <sub>1,2</sub>      | 0.16                                  | 0.11                                   |
| Severe vs. No                                                | 2.09 <sup>**</sup> <sub>1,2</sub>      | 0.98 <sup>***</sup> <sub>1,2</sub>    | 0.57 <sup>*</sup>                     | 0.55                                   |
| Dead vs. No                                                  | 2.96 <sup>**</sup> <sub>1,2</sub>      | 1.31 <sup>****</sup> <sub>1,2</sub>   | 0.80 <sup>**</sup>                    | 0.88 <sup>**</sup>                     |
| Previous treatment (Yes vs. No)                              | 3.01 <sup>****</sup> <sub>1,2</sub>    | 1.14 <sup>****</sup> <sub>1,2,3</sub> | 1.02 <sup>****</sup> <sub>1,2</sub>   | 0.95 <sup>****</sup> <sub>1,2</sub>    |
| Current treatment (Yes vs. No)                               | 2.11 <sup>*</sup> <sub>1,2</sub>       | 0.87 <sup>*</sup> <sub>1,2</sub>      | n.i. <sub>3</sub>                     | 0.89 <sup>*</sup> <sub>1</sub>         |
| Psychoactive medication (Yes vs. No)                         | 3.95 <sup>****</sup> <sub>1,2,3</sub>  | 1.19 <sup>**</sup> <sub>1,2,3</sub>   | 1.74 <sup>****</sup> <sub>1,2,3</sub> | 1.21 <sup>**</sup> <sub>1,2,3</sub>    |
| Positive effect of confinement on relationships (Yes vs. No) | -3.09 <sup>****</sup> <sub>1,2</sub>   | -0.98 <sup>****</sup> <sub>1,2</sub>  | -0.57 <sup>***</sup> <sub>1,2</sub>   | -1.57 <sup>****</sup> <sub>1,2,3</sub> |
| Negative effect of confinement on relationships (Yes vs. No) | 5.52 <sup>****</sup> <sub>1,2,3</sub>  | 2.19 <sup>****</sup> <sub>1,2,3</sub> | 1.16 <sup>****</sup> <sub>1,2,3</sub> | 2.15 <sup>****</sup> <sub>1,2,3</sub>  |
| Positive effect on social relationships                      |                                        | n.i.                                  | 1                                     |                                        |
| Little vs. None                                              | -0.92 <sup>*</sup> <sub>1</sub>        |                                       | -0.21                                 | -0.57 <sup>**</sup> <sub>1,2</sub>     |
| Some vs. None                                                | -0.87                                  |                                       | -0.12                                 | -0.80 <sup>**</sup> <sub>1,2</sub>     |
| Great vs. None                                               | 1.55                                   |                                       | 0.86                                  | 0.21                                   |
| Negative effect on social relationships                      |                                        |                                       |                                       |                                        |
| Little vs. None                                              | 2.62 <sup>****</sup> <sub>1,2</sub>    | 0.99 <sup>****</sup> <sub>1,2</sub>   | 0.48 <sup>**</sup> <sub>1,2</sub>     | 1.13 <sup>****</sup> <sub>1,2,3</sub>  |
| Some vs. None                                                | 5.56 <sup>****</sup> <sub>1,2,3</sub>  | 2.25 <sup>****</sup> <sub>1,2,3</sub> | 1.07 <sup>****</sup> <sub>1,2</sub>   | 2.25 <sup>****</sup> <sub>1,2,3</sub>  |
| Great vs. None                                               | 9.52 <sup>****</sup> <sub>1,2,3</sub>  | 3.59 <sup>****</sup> <sub>1,2,3</sub> | 2.41 <sup>****</sup> <sub>1,2,3</sub> | 3.54 <sup>****</sup> <sub>1,2,3</sub>  |

---

|                                  |        |         |        |        |
|----------------------------------|--------|---------|--------|--------|
| Group (all subjects)             |        |         |        |        |
| Administrative staff vs. Student | -1.93* | -0.55   | -0.71* | -0.74  |
| Academic staff vs. Student       | -0.80  | 0.40    | -0.37  | -0.85* |
| Student group (only students)    |        |         |        |        |
| Master vs. Undergraduate         | n.i.   | -0.99** | n.i.   | n.i.   |
| PhD vs. Undergraduate            |        | -0.29   |        |        |
| Other vs. Undergraduate          |        | 0.16    |        |        |
| Area of Study (only students)    |        |         |        |        |
| Arts vs. Engineering             | 1.99*  |         | 0.73*  | 0.76*  |
| Sciences vs. Engineering         | 1.14   |         | 0.33   | 0.33   |
| Health Sciences vs. Engineering  | -0.12  |         | 0.19   | -0.07  |
| Social Sciences vs. Engineering  | 1.64*  |         | 0.58** | 0.51   |
| Year (only undergraduate)        |        |         |        |        |
|                                  | n.i.   | n.i.    | n.i.   | n.i.   |
| Area of Study (only researchers) |        |         |        |        |
|                                  | n.i.   | n.i.    | n.i.   | n.i.   |

---

\*\*\*\* p < 0.0001, \*\*\* p < 0.001, \*\* p < 0.01, \* p < 0.05. n.i. = not included in the model. <sup>1,2,3</sup>Significant or included respectively in the models with only students, only undergraduate students and only researchers. The coefficients shown in the common variables correspond to the model with all the subjects.

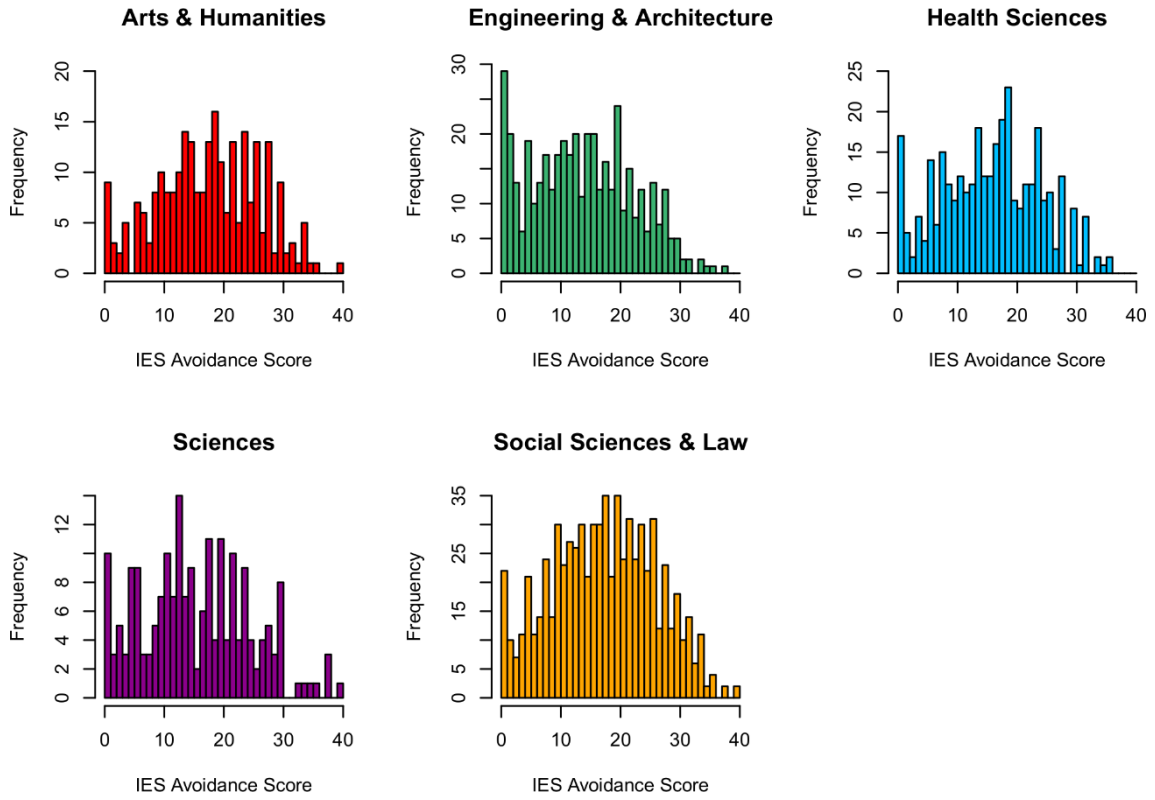

**Supplementary Figure 3.** Histogram of the students' scores of the IES avoidance subscale, organized by area of study.

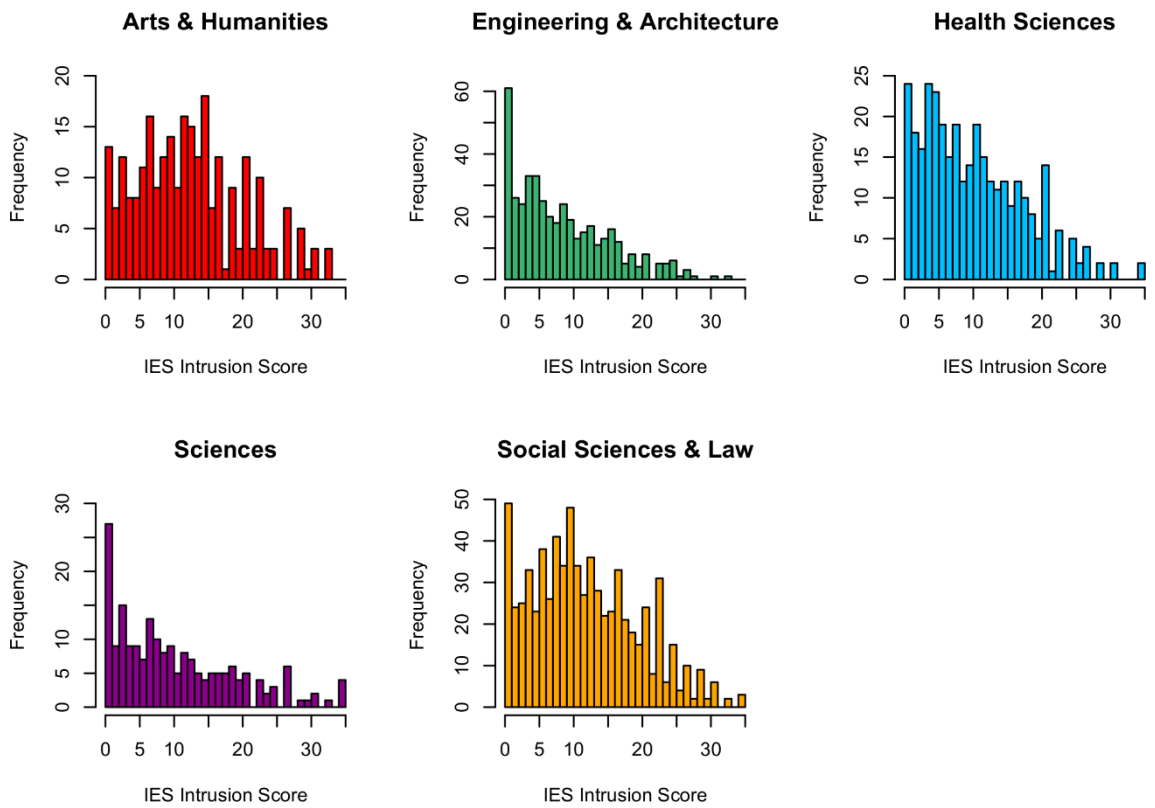

**Supplementary Figure 4.** Histogram of the students' scores of the IES intrusion subscale, organized by area of study.

**Supplementary Table 3.** Univariate GLM coefficients associating IES scores with respondents characteristics from the University of Valladolid.

| Characteristics                                              | IES Total | IES Intrusion | IES Avoidance |
|--------------------------------------------------------------|-----------|---------------|---------------|
| Age                                                          | -0.17**** | -0.02         | -0.15****     |
| Sex (Female vs. Male)                                        | 10.16**** | 4.35****      | 5.81****      |
| Marital status                                               |           |               |               |
| Married vs. Single                                           | -4.42**** | -0.71         | -3.72****     |
| Divorced vs. Single                                          | -2.23     | 0.17          | -2.40         |
| Widowed vs. Single                                           | -10.86*   | -3.23         | -7.63**       |
| Health worker (Yes vs. No)                                   | -0.73     | 0.19          | -0.92         |
| Live with                                                    |           |               |               |
| Alone vs. 2-4 people                                         | -1.27     | 0.13          | -1.40         |
| 1 vs. 2-4 people                                             | -3.18**** | -0.70         | -2.48****     |
| 5+ vs. 2-4 people                                            | -0.49     | -0.64         | 0.15          |
| Changes in employment activity                               |           |               |               |
| No employment activity vs. No                                | 4.75****  | 0.71          | 4.04****      |
| Yes vs. No                                                   | 6.41****  | 2.52****      | 3.90****      |
| COVID-19 test (Yes vs. No)                                   | -2.19     | 0.87          | -3.05         |
| COVID-19 symptoms (Yes vs. No)                               | 3.31**    | 2.18****      | 1.13          |
| Know COVID-19 patient                                        |           |               |               |
| Asymptomatic vs. No                                          | -0.79     | -2.62         | 1.83          |
| Mild vs. No                                                  | 2.79***   | 1.53***       | 1.26*         |
| Moderate vs. No                                              | 3.23****  | 1.63****      | 1.60***       |
| Severe vs. No                                                | 4.62****  | 3.42****      | 1.20          |
| Dead vs. No                                                  | 4.43****  | 3.25****      | 1.18          |
| Previous treatment (Yes vs. No)                              | 4.41****  | 1.77****      | 2.64****      |
| Current treatment (Yes vs. No)                               | 5.79****  | 2.86****      | 2.93****      |
| Psychoactive medication (Yes vs. No)                         | 6.56****  | 3.25****      | 3.31****      |
| Positive effect of confinement on relationships (Yes vs. No) | -0.69     | -0.24         | -0.45         |
| Negative effect of confinement on relationships (Yes vs. No) | 7.15****  | 3.27****      | 3.88****      |
| Positive effect on social relationships                      |           |               |               |
| Little vs. None                                              | -0.49     | -0.30         | -0.19         |
| Some vs. None                                                | 0.38      | 0.28          | 0.10          |
| Great vs. None                                               | 0.75      | 0.26          | 0.48          |
| Negative effect on social relationships                      |           |               |               |
| Little vs. None                                              | 4.10****  | 1.76****      | 2.34****      |
| Some vs. None                                                | 7.18****  | 3.31****      | 3.88****      |
| Great vs. None                                               | 12.02**** | 5.99****      | 6.03****      |

\*\*\*\* p < 0.0001, \*\*\* p < 0.001, \*\* p < 0.01, \* p < 0.05

**Supplementary Table 4.** Multivariate GLM coefficients associating IES scores with respondent characteristics from the University of Valladolid.

| Characteristics                                              | IES Total                              | IES Intrusion                         | IES Avoidance                         |
|--------------------------------------------------------------|----------------------------------------|---------------------------------------|---------------------------------------|
| Independent term                                             | 14.37 <sup>****</sup> <sub>1,2,3</sub> | 4.34 <sup>****</sup> <sub>1,2,3</sub> | 9.65 <sup>****</sup> <sub>1,2,3</sub> |
| Age                                                          | n.i. <sub>3</sub>                      | 0.04 <sub>1</sub>                     | n.i. <sub>3</sub> (< 0)               |
| Sex (Female vs. Male)                                        | 8.78 <sup>****</sup> <sub>1,2,3</sub>  | 3.98 <sup>****</sup> <sub>1,2,3</sub> | 4.91 <sup>****</sup> <sub>1,2,3</sub> |
| Marital status                                               | n.i.                                   | n.i.                                  |                                       |
| Married vs. Single                                           |                                        |                                       | -1.05 <sup>*</sup> <sub>1,2</sub>     |
| Divorced vs. Single                                          |                                        |                                       | 0.23                                  |
| Widowed vs. Single                                           |                                        |                                       | -5.17                                 |
| Health worker (Yes vs. No)                                   | -1.95                                  | n.i.                                  | -1.04                                 |
| Live with                                                    |                                        | n.i.                                  |                                       |
| Alone vs. 2-4 people                                         | -0.34                                  |                                       | -0.51                                 |
| 1 vs. 2-4 people                                             | -1.79 <sup>*</sup>                     |                                       | -1.39 <sup>**</sup> <sub>1,2</sub>    |
| 5+ vs. 2-4 people                                            | -0.21                                  |                                       | 0.43                                  |
| Changes in employment activity                               |                                        | 3                                     |                                       |
| No employment activity vs. No                                | -0.33 <sub>3</sub>                     | -0.79                                 | 0.54 <sub>3</sub> (< 0)               |
| Yes vs. No                                                   | 2.48 <sup>**</sup> <sub>1,2</sub>      | 1.07 <sup>*</sup> <sub>1,2</sub>      | 1.45 <sup>**</sup> <sub>1,2</sub>     |
| COVID-19 test (Yes vs. No)                                   | n.i.                                   | n.i.                                  | n.i. <sub>2</sub>                     |
| COVID-19 symptoms (Yes vs. No)                               | 2.17 <sup>*</sup> <sub>1,2</sub>       | 1.58 <sup>**</sup> <sub>1,2</sub>     | n.i. <sub>1,2</sub>                   |
| Know COVID-19 patient                                        |                                        |                                       |                                       |
| Asymptomatic vs. No                                          | -1.27                                  | -2.97 <sup>*</sup> <sub>2</sub>       | 1.55                                  |
| Mild vs. No                                                  | 1.83 <sup>*</sup>                      | 1.04 <sup>**</sup> <sub>1</sub>       | 0.74                                  |
| Moderate vs. No                                              | 2.15 <sup>**</sup> <sub>1,2</sub>      | 1.02 <sup>**</sup> <sub>1,2</sub>     | 1.09 <sup>*</sup>                     |
| Severe vs. No                                                | 3.96 <sup>****</sup> <sub>1,2</sub>    | 2.86 <sup>****</sup> <sub>1,2</sub>   | 1.06 <sub>2</sub>                     |
| Dead vs. No                                                  | 4.11 <sup>****</sup> <sub>1,2</sub>    | 2.88 <sup>****</sup> <sub>1,2</sub>   | 1.41 <sup>*</sup> <sub>2</sub>        |
| Previous treatment (Yes vs. No)                              | 2.59 <sup>****</sup> <sub>1,2</sub>    | 0.79 <sup>*</sup> <sub>1,2</sub>      | 1.83 <sup>****</sup> <sub>1,2,3</sub> |
| Psychoactive medication (Yes vs. No)                         | 3.59 <sup>**</sup> <sub>1,2,3</sub>    | 1.92 <sup>**</sup> <sub>1,2,3</sub>   | 1.70 <sup>****</sup> <sub>1,2,3</sub> |
| Negative effect of confinement on relationships (Yes vs. No) | 3.41 <sup>****</sup> <sub>1,2,3</sub>  | 1.74 <sup>****</sup> <sub>1,2,3</sub> | 1.68 <sup>****</sup> <sub>1,2,3</sub> |
| Positive effect on social relationships                      |                                        | n.i.                                  | n.i.                                  |
| Little vs. None                                              | 0.33                                   |                                       |                                       |
| Some vs. None                                                | 2.08 <sup>*</sup> <sub>1,2</sub>       | 1 (> 0)                               | 1 (> 0)                               |
| Great vs. None                                               | 2.41 <sub>1</sub>                      |                                       |                                       |
| Negative effect on social relationships                      |                                        |                                       |                                       |
| Little vs. None                                              | 2.85 <sup>****</sup> <sub>1,2,3</sub>  | 1.45 <sup>****</sup> <sub>1,2,3</sub> | 1.20 <sup>**</sup> <sub>1,2</sub>     |
| Some vs. None                                                | 5.33 <sup>****</sup> <sub>1,2,3</sub>  | 2.63 <sup>****</sup> <sub>1,2</sub>   | 2.35 <sup>****</sup> <sub>1,2,3</sub> |
| Great vs. None                                               | 9.50 <sup>****</sup> <sub>1,2,3</sub>  | 4.89 <sup>****</sup> <sub>1,2,3</sub> | 4.23 <sup>****</sup> <sub>1,2</sub>   |
| Group (all subjects)                                         |                                        |                                       |                                       |
| Administrative staff vs. Student                             | -1.43                                  | -0.55                                 | -1.12                                 |
| Academic staff vs. Student                                   | -4.07 <sup>****</sup>                  | -1.63 <sup>**</sup>                   | -2.63 <sup>****</sup>                 |
| Student group (only students)                                | n.i.                                   | n.i.                                  | n.i.                                  |
| Area of Study (only students)                                |                                        |                                       |                                       |
| Arts vs. Engineering                                         | 4.58 <sup>****</sup>                   | 2.51 <sup>****</sup>                  | 1.90 <sup>**</sup>                    |

|                                  |         |          |        |
|----------------------------------|---------|----------|--------|
| Sciences vs. Engineering         | 1.78    | 1.04     | 0.74   |
| Health Sciences vs. Engineering  | -0.07   | 0.03     | -0.13  |
| Social Sciences vs. Engineering  | 3.04*** | 1.74**** | 1.31*  |
| Year (only undergraduate)        | n.i.    | n.i.     | n.i.   |
| Area of Study (only researchers) |         |          |        |
| Arts vs. Engineering             | 6.07**  | 3.23**   | 2.61*  |
| Sciences vs. Engineering         | 4.65*   | 2.10     | 2.53   |
| Health Sciences vs. Engineering  | 4.70*   | 1.97     | 2.78*  |
| Social Sciences vs. Engineering  | 6.14**  | 2.54*    | 3.35** |

\*\*\*\*  $p < 0.0001$ , \*\*\*  $p < 0.001$ , \*\*  $p < 0.01$ , \*  $p < 0.05$ . n.i. = not included in the model. <sup>1,2,3</sup>Significant or included respectively in the models with only students, only undergraduate students and only researchers. The coefficients shown in the common variables correspond to the model with all the subjects.



**Supplementary Table 5.** Univariate GLM coefficients associating concern with respondents characteristics from the University of Valladolid (part 1).

| Characteristics                                              | Own Health | Pair Health | Parents Health | Children Health |
|--------------------------------------------------------------|------------|-------------|----------------|-----------------|
| Age                                                          | -0.02      | 0.03****    | 0.02****       | 0.12****        |
| Sex (Female vs. Male)                                        | 0.70****   | 0.23        | 0.57****       | -0.47           |
| Marital status                                               |            |             |                |                 |
| Married vs. Single                                           | 0.45**     | 0.75****    | 0.33**         | 3.87****        |
| Divorced vs. Single                                          | 0.50       | 0.58        | 0.47           | 4.81****        |
| Widowed vs. Single                                           | -0.51      | 0.67        | 0.39           | 3.73**          |
| Health worker (Yes vs. No)                                   | 0.25       | 0.27        | 0.22           | 0.61            |
| Live with                                                    |            |             |                |                 |
| Alone vs. 2-4 people                                         | 0.75**     | -0.33       | 0.46*          | -0.19           |
| 1 vs. 2-4 people                                             | 0.21       | 0.26        | 0.29*          | 0.60            |
| 5+ vs. 2-4 people                                            | -0.48      | -1.13**     | -0.31          | -0.37           |
| Changes in employment activity                               |            |             |                |                 |
| No employment activity vs. No Yes vs. No                     | -0.64****  | -0.50**     | -0.43***       | -3.57****       |
| COVID-19 test (Yes vs. No)                                   | 1.69*      | 0.88        | 0.74           | 1.27            |
| COVID-19 symptoms (Yes vs. No)                               | 0.07       | -0.22       | 0.01           | -0.78           |
| Know COVID-19 patient                                        |            |             |                |                 |
| Asymptomatic vs. No                                          | -0.37      | 0.44        | -0.12          | 0.28            |
| Mild vs. No                                                  | -0.20      | -0.11       | -0.08          | 0.92*           |
| Moderate vs. No                                              | -0.01      | -0.29       | 0.14           | -0.27           |
| Severe vs. No                                                | 0.48*      | 0.45        | 0.52**         | 0.35            |
| Dead vs. No                                                  | 0.30       | 0.53        | 0.52**         | 1.21*           |
| Previous treatment (Yes vs. No)                              | 0.19       | 0.03        | 0.08           | 0.07            |
| Current treatment (Yes vs. No)                               | 0.11       | 0.07        | -0.17          | 0.75            |
| Psychoactive medication (Yes vs. No)                         | 0.13       | 0.01        | 0.12           | 1.02            |
| Positive effect of confinement on relationships (Yes vs. No) | 0.07       | 0.08        | 0.30**         | 0.74 *          |
| Negative effect of confinement on relationships (Yes vs. No) | -0.01      | -0.26       | 0.10           | -0.83*          |
| Positive effect on social relationships                      |            |             |                |                 |
| Little vs. None                                              | 0.09       | 0.14        | 0.27**         | 0.75*           |
| Some vs. None                                                | 0.48*      | 0.63*       | 0.61***        | 1.35**          |
| Great vs. None                                               | 1.20**     | 1.28*       | 0.58           | 2.15*           |
| Negative effect on social relationships                      |            |             |                |                 |
| Little vs. None                                              | -0.10      | 0.12        | -0.06          | -0.69*          |
| Some vs. None                                                | 0.01       | -0.09       | 0.13           | -1.50****       |
| Great vs. None                                               | 0.71**     | 0.65*       | 0.64***        | -0.62           |

\*\*\*\* p < 0.0001, \*\*\* p < 0.001, \*\* p < 0.01, \* p < 0.05.

**Supplementary Table 6.** Univariate GLM coefficients associating concern with respondent characteristics from the University of Valladolid (part 2).

| Characteristics                                              | Family Health | Friends Health | Social Situation | Economic Situation |
|--------------------------------------------------------------|---------------|----------------|------------------|--------------------|
| Age                                                          | -0.02****     | 0.02***        | 0.01****         | 0.01***            |
| Sex (Female vs. Male)                                        | 0.65****      | 0.77****       | 0.78****         | 0.58****           |
| Marital status                                               |               |                |                  |                    |
| Married vs. Single                                           | -0.67****     | 0.05           | 0.10             | 0.09               |
| Divorced vs. Single                                          | -0.71*        | 1.14**         | 0.91**           | 0.55               |
| Widowed vs. Single                                           | -1.21         | -0.45          | 0.04             | 0.86               |
| Health worker (Yes vs. No)                                   | -0.06         | 0.15           | 0.01             | -0.31              |
| Live with                                                    |               |                |                  |                    |
| Alone vs. 2-4 people                                         | -0.23         | 0.64**         | 0.43*            | 0.37               |
| 1 vs. 2-4 people                                             | -0.17         | 0.27           | 0.12             | 0.22               |
| 5+ vs. 2-4 people                                            | -0.32         | -0.20          | -0.29            | -0.29              |
| Changes in employment activity                               |               |                |                  |                    |
| No employment activity vs. No Yes vs. No                     | 0.45***       | -0.14          | -0.30**          | -0.05              |
| COVID-19 test (Yes vs. No)                                   | -0.06         | 1.32           | 1.19*            | 0.62               |
| COVID-19 symptoms (Yes vs. No)                               | -0.05         | -0.10          | -0.06            | -0.23              |
| Know COVID-19 patient                                        |               |                |                  |                    |
| Asymptomatic vs. No                                          | -0.45         | -0.36          | -0.05            | 0.18               |
| Mild vs. No                                                  | 0.07          | -0.08          | 0.09             | 0.07               |
| Moderate vs. No                                              | 0.27*         | 0.07           | 0.11             | 0.18               |
| Severe vs. No                                                | 0.61***       | 0.68***        | 0.65****         | 0.37*              |
| Dead vs. No                                                  | 0.37*         | 0.51*          | 0.33             | 0.23               |
| Previous treatment (Yes vs. No)                              | -0.08         | 0.04           | 0.01             | -0.18              |
| Current treatment (Yes vs. No)                               | -0.33         | -0.13          | -0.24            | -0.27              |
| Psychoactive medication (Yes vs. No)                         | -0.29         | -0.17          | -0.08            | -0.21              |
| Positive effect of confinement on relationships (Yes vs. No) | 0.28**        | 0.26*          | 0.31***          | 0.08               |
| Negative effect of confinement on relationships (Yes vs. No) | 0.15          | 0.08           | 0.08             | -0.04              |
| Positive effect on social relationships                      |               |                |                  |                    |
| Little vs. None                                              | 0.23*         | 0.21           | 0.26**           | 0.14               |
| Some vs. None                                                | 0.23          | 0.57**         | 0.47**           | 0.08               |
| Great vs. None                                               | 0.18          | 1.37***        | 1.04***          | 0.37               |
| Negative effect on social relationships                      |               |                |                  |                    |
| Little vs. None                                              | 0.22**        | 0.16           | 0.09             | 0.10               |
| Some vs. None                                                | 0.55****      | 0.44**         | 0.40**           | 0.32*              |
| Great vs. None                                               | 0.73****      | 0.84****       | 0.55**           | 0.50**             |

\*\*\*\*  $p < 0.0001$ , \*\*\*  $p < 0.001$ , \*\*  $p < 0.01$ , \*  $p < 0.05$ .

**Supplementary Table 7.** Multivariate GLM coefficients associating concern with respondent characteristics from the University of Valladolid.

| Characteristics                                              | Own Health                            | Partner Health                        | Parents Health                        | Children Health                     |
|--------------------------------------------------------------|---------------------------------------|---------------------------------------|---------------------------------------|-------------------------------------|
| Independent term                                             | 3.62 <sup>****</sup> <sub>1,2,3</sub> | 4.95 <sup>****</sup> <sub>1,2,3</sub> | 7.10 <sup>****</sup> <sub>1,2,3</sub> | 0.93 <sub>3</sub>                   |
| Age                                                          | 0.04 <sup>****</sup> <sub>1,2</sub>   | 0.03 <sup>****</sup> <sub>3</sub>     | n.i. <sub>3</sub> (> 0)               | 0.06 <sup>****</sup> <sub>1,2</sub> |
| Sex (Female vs. Male)                                        | 0.81 <sup>****</sup> <sub>1,2</sub>   | 0.38 <sup>*</sup> <sub>1,2</sub>      | 0.58 <sup>****</sup> <sub>1,2,3</sub> | 0.45                                |
| Marital status                                               |                                       | n.i.                                  | n.i.                                  |                                     |
| Married vs. Single                                           | -0.27                                 | 1 (> 0)                               | 3 (< 0)                               | 2.25 <sup>****</sup> <sub>1,2</sub> |
| Divorced vs. Single                                          | -0.68                                 |                                       |                                       | 2.48 <sup>***</sup> <sub>1</sub>    |
| Widowed vs. Single                                           | -2.16 <sup>*</sup> <sub>1,2</sub>     |                                       |                                       | 0.58                                |
| Health worker (Yes vs. No)                                   | n.i.                                  | n.i. <sub>3</sub>                     | n.i. <sub>3</sub>                     | n.i. <sub>2</sub>                   |
| Live with                                                    | n.i.                                  | 2                                     | n.i.                                  | n.i.                                |
| Alone vs. 2-4 people                                         |                                       | -0.54                                 |                                       |                                     |
| 1 vs. 2-4 people                                             |                                       | 0.09                                  |                                       | 3 (> 0)                             |
| 5+ vs. 2-4 people                                            |                                       | -1.04 <sup>**</sup> <sub>1,3</sub>    |                                       |                                     |
| Changes in employment activity                               | <sub>3</sub>                          |                                       | n.i.                                  | <sub>1,2</sub>                      |
| No employment activity vs. No                                | -0.28                                 | -0.08                                 |                                       | -0.75                               |
| Yes vs. No                                                   | 0.06                                  | 0.30 <sub>3</sub>                     |                                       | 0.61 <sup>*</sup>                   |
| COVID-19 test (Yes vs. No)                                   | 1.16 <sub>1,2</sub>                   | n.i.                                  | n.i.                                  | n.i.                                |
| COVID-19 symptoms (Yes vs. No)                               | n.i.                                  | n.i.                                  | n.i.                                  | -0.63                               |
| Know COVID-19 patient                                        | n.i.                                  | n.i.                                  | 2                                     | n.i.                                |
| Asymptomatic vs. No                                          |                                       |                                       | -0.05                                 |                                     |
| Mild vs. No                                                  |                                       |                                       | -0.14                                 |                                     |
| Moderate vs. No                                              |                                       | 1,2 (< 0)                             | 0.06                                  |                                     |
| Severe vs. No                                                |                                       |                                       | 0.37 <sup>*</sup>                     |                                     |
| Dead vs. No                                                  |                                       |                                       | 0.35 <sub>1</sub>                     |                                     |
| Current treatment (Yes vs. No)                               | n.i. <sub>3</sub>                     | n.i.                                  | -0.31 <sub>1,2</sub>                  | 0.95 <sup>*</sup>                   |
| Positive effect of confinement on relationships (Yes vs. No) | n.i. <sub>3</sub>                     | n.i.                                  | 0.19 <sub>1,2</sub>                   | n.i. <sub>1,2</sub>                 |
| Negative effect of confinement on relationships (Yes vs. No) | n.i.                                  | n.i.                                  | n.i.                                  | 0.48 <sub>3</sub>                   |
| Positive effect on social relationships                      |                                       |                                       |                                       |                                     |
| Little vs. None                                              | 0.14                                  | 0.21                                  | 0.31 <sup>**</sup> <sub>1,2</sub>     | 0.63 <sup>*</sup>                   |
| Some vs. None                                                | 0.42 <sup>*</sup> <sub>3</sub>        | 0.66 <sup>*</sup> <sub>1,2</sub>      | 0.59 <sup>***</sup> <sub>1,2</sub>    | 0.93 <sup>*</sup>                   |
| Great vs. None                                               | 1.05 <sup>*</sup> <sub>3</sub>        | 1.32 <sup>*</sup>                     | 0.52                                  | 1.92 <sup>*</sup> <sub>3</sub>      |
| Negative effect on social relationships                      |                                       |                                       | 3                                     | n.i. <sub>3</sub>                   |
| Little vs. None                                              | 0.15                                  | 0.40 <sup>*</sup> <sub>1</sub>        | 0.09                                  |                                     |
| Some vs. None                                                | 0.37 <sup>*</sup>                     | 0.25                                  | 0.44 <sup>**</sup> <sub>1,2</sub>     |                                     |
| Great vs. None                                               | 1.07 <sup>****</sup> <sub>1,2</sub>   | 1.03 <sup>***</sup> <sub>1,2</sub>    | 0.97 <sup>****</sup> <sub>1,2</sub>   |                                     |
| Group (all subjects)                                         | n.i.                                  | n.i.                                  |                                       | n.i.                                |
| Administrative staff vs. Student                             |                                       |                                       | 0.81 <sup>****</sup>                  |                                     |
| Academic staff vs. Student                                   |                                       |                                       | 0.77 <sup>****</sup>                  |                                     |

|                                  |         |       |                |      |
|----------------------------------|---------|-------|----------------|------|
| Student group (only students)    | n.i.    | n.i.  |                | n.i. |
| Master vs. Undergraduate         |         |       | -0.03          |      |
| PhD vs. Undergraduate            |         |       | 0.43           |      |
| Other vs. Undergraduate          |         |       | 2.30*          |      |
| Area of Study (only students)    |         |       | Under-graduate | n.i. |
| Arts vs. Engineering             | 0.49*   | 0.39  | 0.47*          |      |
| Sciences vs. Engineering         | 0.14    | 0.32  | 0.30           |      |
| Health Sciences vs. Engineering  | -0.02   | -0.18 | 0.04           |      |
| Social Sciences vs. Engineering  | 0.65*** | 0.54* | 0.36*          |      |
| Year (only undergraduate)        |         | n.i.  | n.i.           | n.i. |
| 2 vs. 1                          | -0.43*  |       |                |      |
| 3 vs. 1                          | -0.55*  |       |                |      |
| 4 vs. 1                          | -0.60** |       |                |      |
| 5 vs. 1                          | -0.45   |       |                |      |
| 6 vs. 1                          | -1.17*  |       |                |      |
| Area of Study (only researchers) | n.i.    | n.i.  | n.i.           | n.i. |

\*\*\*\*  $p < 0.0001$ , \*\*\*  $p < 0.001$ , \*\*  $p < 0.01$ , \*  $p < 0.05$ . n.i. = not included in the model. <sup>1,2,3</sup>Significant or included respectively in the models with only students, only undergraduate students and only researchers. The coefficients shown in the common variables correspond to the model with all the subjects.

**Supplementary Table 8.** Multivariate GLM coefficients associating concern with respondent characteristics from the University of Valladolid.

| Characteristics                                              | Family Health                         | Friends Health                        | Social Situation                      | Economic Situation                    |
|--------------------------------------------------------------|---------------------------------------|---------------------------------------|---------------------------------------|---------------------------------------|
| Independent term                                             | 7.73 <sup>****</sup> <sub>1,2,3</sub> | 4.87 <sup>****</sup> <sub>1,2,3</sub> | 6.55 <sup>****</sup> <sub>1,2,3</sub> | 6.94 <sup>****</sup> <sub>1,2,3</sub> |
| Age                                                          | -0.01 <sup>*</sup> <sub>1,2</sub>     | 0.02 <sup>**</sup> <sub>2,3</sub>     | 0.01                                  | 0.02 <sup>****</sup> <sub>1,2,3</sub> |
| Sex (Female vs. Male)                                        | 0.53 <sup>****</sup> <sub>1,2,3</sub> | 0.77 <sup>****</sup> <sub>1,2,3</sub> | 0.79 <sup>****</sup> <sub>1,2,3</sub> | 0.68 <sup>****</sup> <sub>1,2,3</sub> |
| Marital status                                               |                                       |                                       |                                       | n.i.                                  |
| Married vs. Single                                           | -0.39 <sup>**</sup> <sub>3</sub>      | -0.38 <sup>*</sup> <sub>3</sub>       | -0.27 <sup>*</sup>                    |                                       |
| Divorced vs. Single                                          | -0.31 <sub>3</sub>                    | 0.49 <sub>1</sub>                     | 0.30 <sub>1,2</sub>                   |                                       |
| Widowed vs. Single                                           | -0.76                                 | -1.45                                 | -0.72                                 |                                       |
| Health worker (Yes vs. No)                                   | n.i. <sub>2,3</sub>                   | n.i. <sub>3</sub>                     | n.i. <sub>2</sub>                     | -0.47 <sup>**</sup> <sub>1</sub>      |
| Live with                                                    | n.i.                                  | n.i.                                  | n.i.                                  | n.i. <sub>3</sub>                     |
| Alone vs. 2-4 people                                         |                                       |                                       |                                       |                                       |
| 1 vs. 2-4 people                                             |                                       |                                       |                                       |                                       |
| 5+ vs. 2-4 people                                            | 3 (<0)                                | 3 (<0)                                |                                       |                                       |
| Changes in employment activity                               | n.i.                                  | n.i. <sub>3</sub>                     | n.i. <sub>3</sub>                     |                                       |
| No employment activity vs. No                                |                                       |                                       |                                       | 0.13                                  |
| Yes vs. No                                                   |                                       |                                       |                                       | 0.32 <sup>*</sup> <sub>1,3</sub>      |
| COVID-19 test (Yes vs. No)                                   | n.i.                                  | 1.11 <sub>2</sub>                     | 1.02 <sub>2</sub>                     | n.i.                                  |
| COVID-19 symptoms (Yes vs. No)                               | n.i.                                  | n.i.                                  | n.i.                                  | n.i. <sub>1,2</sub> (<0)              |
| Know COVID-19 patient                                        |                                       |                                       |                                       | n.i.                                  |
| Asymptomatic vs. No                                          | -0.47                                 | -0.39                                 | -0.07                                 |                                       |
| Mild vs. No                                                  | -0.01                                 | -0.15                                 | 0.00                                  |                                       |
| Moderate vs. No                                              | 0.23 <sub>1</sub>                     | -0.03                                 | 0.02                                  |                                       |
| Severe vs. No                                                | 0.61 <sup>***</sup> <sub>1,2</sub>    | 0.53 <sup>**</sup> <sub>1</sub>       | 0.50 <sup>**</sup> <sub>1,2</sub>     |                                       |
| Dead vs. No                                                  | 0.42 <sup>*</sup> <sub>1,2</sub>      | 0.37                                  | 0.20                                  |                                       |
| Previous treatment (Yes vs. No)                              | n.i. <sub>3</sub>                     | n.i. <sub>3</sub> (<0)                | n.i. <sub>3</sub>                     | -0.25 <sup>*</sup> <sub>1,2</sub>     |
| Current treatment (Yes vs. No)                               | -0.46 <sup>**</sup> <sub>1,2</sub>    | n.i.                                  | -0.41 <sup>*</sup> <sub>1,2</sub>     | n.i. <sub>3</sub> (<0)                |
| Psychoactive treatment (Yes vs. No)                          | n.i.                                  | -0.42 <sub>1,2</sub>                  | n.i.                                  | n.i.                                  |
| Positive effect of confinement on relationships (Yes vs. No) | 0.27 <sup>**</sup> <sub>1,2</sub>     | n.i. <sub>2</sub> (>0)                | 0.22 <sup>**</sup> <sub>1,2</sub>     | n.i.                                  |
| Negative effect of confinement on relationships (Yes vs. No) | n.i. <sub>1</sub>                     | n.i. <sub>1,3</sub>                   | n.i.                                  | -0.18 <sub>1,3</sub>                  |
| Positive effect on social relationships                      |                                       |                                       |                                       | n.i.                                  |
| Little vs. None                                              | 0.24 <sup>*</sup> <sub>1,2</sub>      | 0.29 <sup>*</sup> <sub>1,2</sub>      | 0.27 <sup>**</sup> <sub>1,2</sub>     |                                       |
| Some vs. None                                                | 0.32 <sup>*</sup> <sub>2</sub>        | 0.66 <sup>****</sup> <sub>1,2,3</sub> | 0.47 <sup>**</sup> <sub>1,2</sub>     |                                       |
| Great vs. None                                               | 0.30                                  | 1.45 <sup>****</sup> <sub>1,3</sub>   | 0.98 <sup>**</sup> <sub>1,2,3</sub>   |                                       |
| Negative effect on social relationships                      |                                       |                                       |                                       |                                       |
| Little vs. None                                              | 0.12                                  | 0.36 <sup>**</sup> <sub>1,2</sub>     | 0.24 <sup>*</sup> <sub>1,2</sub>      | 0.21                                  |
| Some vs. None                                                | 0.53 <sup>****</sup> <sub>1,2</sub>   | 0.80 <sup>****</sup> <sub>1,2</sub>   | 0.70 <sup>****</sup> <sub>1,2</sub>   | 0.50 <sup>****</sup> <sub>1,2</sub>   |
| Great vs. None                                               | 0.76 <sup>****</sup> <sub>1,2</sub>   | 1.21 <sup>****</sup> <sub>1,2</sub>   | 0.91 <sup>****</sup> <sub>1,2</sub>   | 0.67 <sup>****</sup> <sub>1,2</sub>   |

|                                  |       |         |        |        |
|----------------------------------|-------|---------|--------|--------|
| Group (all subjects)             | n.i.  |         |        | n.i.   |
| Administrative staff vs. Student |       | 0.48    | 0.46*  |        |
| Academic staff vs. Student       |       | 0.10    | 0.50** |        |
| Student group (only students)    |       | n.i.    | n.i.   | n.i.   |
| Master vs. Undergraduate         | 0.02  |         |        |        |
| PhD vs. Undergraduate            | 0.60  |         |        |        |
| Other vs. Undergraduate          | 1.48* |         |        |        |
| Area of Study (only students)    | n.i.  |         |        |        |
| Arts vs. Engineering             |       | 0.64**  | 0.39*  | 0.21   |
| Sciences vs. Engineering         |       | 0.09    | -0.06  | 0.06   |
| Health Sciences vs. Engineering  |       | 0.09    | 0.24   | 0.10   |
| Social Sciences vs. Engineering  |       | 0.65*** | 0.35*  | 0.42** |
| Year (only undergraduate)        | n.i.  |         | n.i.   | n.i.   |
| 2 vs. 1                          |       | 0.05    |        |        |
| 3 vs. 1                          |       | -0.20   |        |        |
| 4 vs. 1                          |       | -0.49*  |        |        |
| 5 vs. 1                          |       | -0.70*  |        |        |
| 6 vs. 1                          |       | -1.08*  |        |        |
| Area of Study (only researchers) | n.i.  | n.i.    | n.i.   | n.i.   |

\*\*\*\*  $p < 0.0001$ , \*\*\*  $p < 0.001$ , \*\*  $p < 0.01$ , \*  $p < 0.05$ . n.i. = not included in the model. <sup>1,2,3</sup>Significant or included respectively in the models with only students, only undergraduate students and only researchers. The coefficients shown in the common variables correspond to the model with all the subjects.
